# Supplementary material for: Molecular Framework of a Regulatory Circuit Initiating Two-Dimensional Spatial Patterning of Stomatal Lineage
Source: PLoS Genet. 2015 Jul 23;11(7):e1005374. doi: 10.1371/journal.pgen.1005374 (PMC4512730; doi:10.1371/journal.pgen.1005374)
Supplement: S2 Table — (XLS) [file pgen.1005374.s003.xls]

## Sheet: Sheet1
Supplementary Table 2. List of Plasmids constructed in this study
Plasmid ID	Description	Insert	Vector	Bac R	Plant R
pAR130	SCRM promoter casette	SCRM promoter	pENTR/5'-TOPO	Kan	NA
pAR132	NLS:3xGFP NosT casette	nls-3xGFP	pGWB501 R4	Spec/Strep	NA
pAR152	SCRMpromoter::nucGFP (nls-3xGFP)	SCRM promoter and nls-3xGFP	pAR130, pKUT612	Spec/Strep	Hyg
pAR175	SPCH promoter casette	SPCH promoter	pENTR 5'-TOPO	Kan	NA
pAR200	SPCHpromoter::nucGFP (nls-3xGFP)	SPCH promoter and nls-3xGFP	pAR175, pKUT612	Spec/Strep	Hyg
pJT156	SCRM2promoter casette	SCRM2 promoter	pENTR 5'-TOPO	Kan	NA
pJT160	GFP-SCRM2	GFP-SCRM2	pENTR-D	Kan	NA
pJT161	SCRM2promoter::GFP-SCRM2	SCRM2 promoter and GFP-SCRM2	pGWB501 R4	Spec/Strep	Hyg
pJT167	SCRM2promoter::nucGFP (nls-3xGFP)	SCRM2 promoter and nls-3xGFP	pAR132, pKUT612	Spec/Strep	Hyg
pKUT612	pENTR-Keiko	NA	pENTR-D	Kan	NA
pRJH64	EPF2pro::LUC	EPF2 promoter	pGreen0800-LUC, pAR255	Kan	NA
pRJH68	SCRMpro::LUC	SCRM promoter	pGreen0800-LUC	Kan	NA
pLJP246	estradiol-inducible SPCH	SPCH CDS	pER8	Spec/Strep	Hyg
